# Supplementary material for: Identification of drug combinations on the basis of machine learning to maximize anti-aging effects
Source: PLOS journal article supplement (doi:10.1371/journal.pone.0246106), 2021-01-28

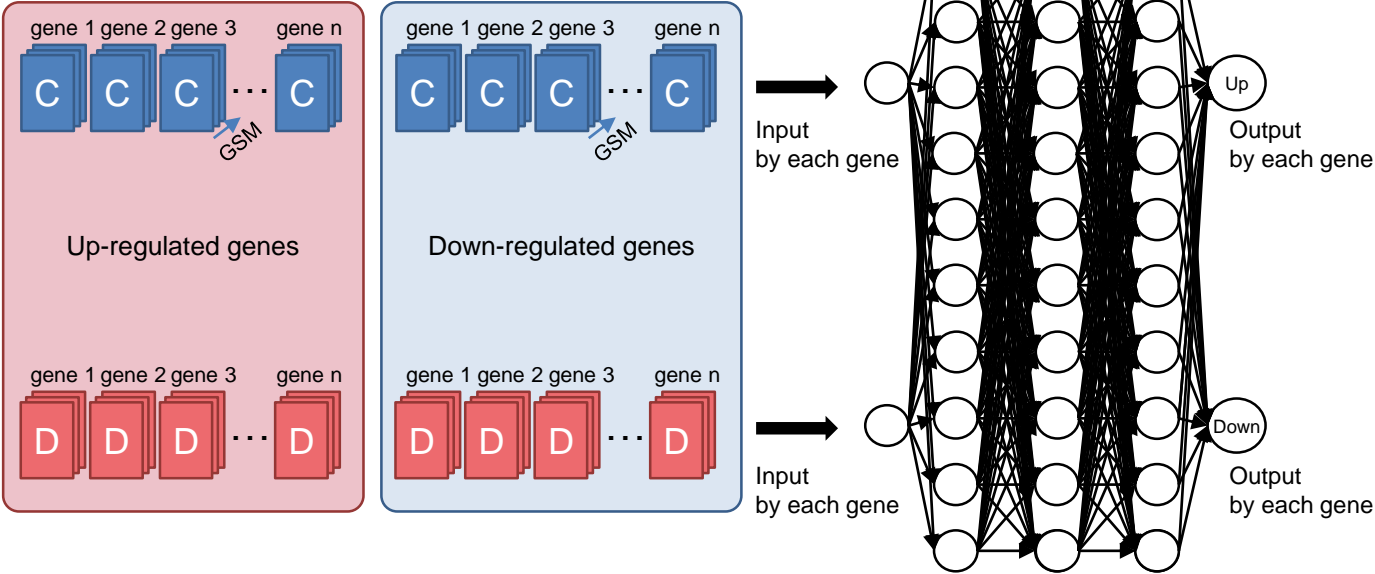

Supplement: S9 (10.1371/journal.pone.0246106.s009) [file journal.pone.0246106.s009]
